# Supplementary material for: Pathogenic variants in PIDD1 lead to an autosomal recessive neurodevelopmental disorder with pachygyria and psychiatric features
Source: Springer Nature journal article supplement (doi:10.1038/s41431-021-00910-0), 2021-06-24
Supplement: MOESM3 [file 41431_2021_910_MOESM3_ESM.xls]

## Sheet: Feuil2
	Current cohort															Previously reported patients
Family ID (the investigators)	Family 1	Family 2		Family 3		Family 4			Family 5	Family 6		Family Manipal-1 - Sheikh et al. 2021	Family AS110 - Harripaul et al. 2018							Family AS105 - Harripaul et al. 2018		Family M278 - Hu et al. 2019		Family M8700004 - Hu et al. 2019
Padient ID	G-3771 IV:3	G-4482 IV:3	G-4482 IV:4	G-34459 IV:1	G-34459 IV:3	IV:2	IV:3	IV:4	IV:1	IV:1	IV:2	IV:3	AS110 V-3	AS110 V-1	AS110 V-4	AS110 V-8	AS110 IV-3	AS110 IV-12	AS110 V-9	AS105 III-5	AS105 III-4	M278 II-1	M278 II-2	M8700004 III:3	M8700004 III:5	M8700004 III:6
cDNA (NM_145886.4)	c.2584C>T	c.2584C>T		c.1340G>A		c.2116_2120del			c.1564_1565del	c.1804_1805del		c.1909C>T	c.2587C>T							c.2587C>T		c.2275-1G>A		c.2443C>T
Protein (NP_665893.2)	p.(Arg862Trp)	p.(Arg862Trp)		p.(Trp447*)		p.(Val706Hisfs*30)			p.(Gln522fs*44)	p.(Gly602fs*26)		p.(Arg637*)	p.(Gln863*)							p.(Gln863*)		p.(Arg759Glyfs*1)		p.(Arg815Trp)
Zygosity	Homozygous	Homozygous		Homozygous		Homozygous			Homozygous	Homozygous		Homozygous	Homozygous							Homozygous		Homozygous		Homozygous
Epidemiological data
Consanguinity of parents	Yes	Yes	Yes	Yes	Yes	Yes	Yes	Yes	Yes	Yes	Yes	yes	no	no	no	no	no	no	no	no	no	Yes	Yes	Yes	Yes	Yes
Ethnic background	Egyptian	Egyptian	Egyptian	Egyptian	Egyptian	pakistani	Pakistani	Pakistani	Palestinian	Colombian	Colombian	Indian	Pakistani	Pakistani	Pakistani	Pakistani	Pakistani	Pakistani	Pakistani	Pakistani	Pakistani	Iran	Iran	Iran	Iran	Iran
Gender	Female	Male	Female	Male	Female	Female	Female	Female	Female	Male	Male	Female	Male	Male	Female	Male	Female	Male	Male	Male	Female	Male	Male	Female	Female	Male
Age at last follow up	8y	22y	18y	24y	17y	14y	11y	8y	8m	11y	15y	10y	30y	35y	30y	19y	47y	47y	18y	4y	6y	21y	18y	26y	24y	23y
Pregnancy and perinatal history	Normal	Normal	Normal	Normal	Normal	Pregnancy-induced hypertension with poor compliance to medication	Pregnancy-induced hypertension with poor compliance to medication	Pregnancy-induced hypertension with poor compliance to medication, IUGR	Pregnancy complicated by Polyhydramnios. Delivery type E C/S at at 34-week gestaion due to placental insuffecincey. Apgar score 8-9. Mild respiratory distress after delivery that needed O2 supplemention via nasal canula for a few days after birth.	Normal	Normal	Normal	NA	NA	NA	NA	NA	NA	NA	NA	NA	NA	NA	NA	NA	NA
Growth
Gestational age at birth (weeks)	40	38	39	39	40	Term	Term	Term	34	38	36	Term	NA	NA	NA	NA	NA	NA	NA	NA	NA	NA	NA	Term	Term	Term
length at birth (cm/SD)	48cm (-0.7SD)	50cm (0.6SD)	48cm (-0.7SD)	49cm (-0.5SD)	50cm (+0.3SD)	NA	NA	NA	44 cm	48cm	46cm	NA	NA	NA	NA	NA	NA	NA	NA	NA	NA	NA	NA	In the normal range	In the normal range	In the normal range
Weight at birth (kg/SD)	3.2kg (-0.5SD)	3.5kg +0.2SD)	3.2kg (-0.5SD)	3.4 kg (-0.2SD)	3.4kg (mean)	NA	NA	NA	2.02 kilogram	3,2Kg	2,8Kg	2.5 kg (-1.8 SD)	NA	NA	NA	NA	NA	NA	NA	NA	NA	NA	NA	In the normal range	In the normal range	In the normal range
Head circumference at birth (cm/SD)	34cm (-0.4SD)	35cm(-0.5SD)	33.5cm (-0.4SD)	35cm (-0.5SD)	34cm (mean)	NA	NA	NA	32 cm	NA	NA	NA	NA	NA	NA	NA	NA	NA	NA	NA	NA	NA	NA	In the normal range	In the normal range	In the normal range
Current height (cm/SD)	130 (+0.2SD)	168cm (-1.2SD)	161cm (-0.2SD)	163cm (-1.8SD)	160cm (-0.3SD)	153cm(-1.12SD)	138cm(-0.8SD)	121cm(-1.2SD)	66 cm	NA	NA	122 cm (-1.8 SD)	NA	164.6cm(-1.7SD)	149cm(-3.48SD)	158.4cm(-2.6SD)	152.4cm(-1.5SD)	164.5cm(-1.7SD)	NA	NA	NA	178cm (+0.2SD)	167 cm (-1.6SD)	150cm (-2.0SD)	144 (-2.97)	168 cm (+0.7SD)
Current weight (kg/SD)	23kg (-0.6D)	81kg (+0.75SD)	62kg (+0.6SD)	78kg (+0.56SD)	53kg (-0.35SD)	32kg(-2.5SD)	27kg(-1.8SD)	25kg(-90.2SD)	6.9 Kilogram	NA	NA	21.5 kg (1.6 SD)	NA	62kg(-0.8SD)	50kg(-2.2SD)	55kg(-1.6SD)	53kg(-0.6SD)	62kg(-0.8SD)	NA	NA	NA	NA	NA	NA	NA	NA
Current head circumference (cm/SD)	51cm (-0.7SD)	59cm (+2.2SD)	58.5cm (+0.2SD)	55cm (-0.07SD)	54cm (mean)	53cm(-0.8SD)	52.1cm(-0.5SD)	51cm(-0.5SD)	43 cm	NA	NA	50 cm (-2.8 SD)	NA	54cm(-0.7SD)	52cm(-2SD)	53cm(-1.4SD)	53cm(-1.2SD)	55cm(-0SD)	NA	NA	NA	56 cm (+0.6SD)	54 cm (–0.7SD)	53cm (–1.2SD)	56 (+1.5SD)	54 cm (–0.3SD)
Development
Motor delay	Yes	Yes	Yes	Yes	Yes	Yes	Yes	Yes	Yes	No	Yes	Yes	Yes	yes	yes	yes	yes	yes	yes	yes	yes	yes	yes	yes	yes	yes
Hypotonia in infancy	Yes	Yes	Yes	Yes	Yes	Yes	Yes	Yes	Yes	No	Yes	no	NA	NA	NA	NA	NA	NA	NA	NA	NA	NA	NA	NA	NA	NA
Age at unsupport sitting	11m	1y 2m	1y	10m	1y	20mo	2yrs	2.5yrs	not attained yet	6m	9m	8m	NA	NA	NA	1y	NA	NA	NA	NA	NA	8m	8m	NA	NA	NA
Age at walking	2y	2y 3m	1y 8m	1y 9m	2y 2m	2.5yrs	3yrs	4yrs	*	12m	18m	14m	NA	NA	NA	1y 9m	NA	NA	NA	NA	NA	18m	18m	NA	NA	NA
Speech delay	Yes	Yes	Yes	Yes	Yes	Y	Y	Y	*	yes	yes	yes	NA	yes	yes	yes	yes	yes	NA	yes	NA	Yes	yes	yes	yes	yes
Age at first words	2y 7m	4y	3y	5y	4y6m	32mo	3yrs	4yrs	*	18m	18m	Monosyllables at 24 months and bi syllables by 26 months	NA	3.5y	3.5y	3y	NA	NA	NA	-	NA	12m but then delay	12m but then delay	NA	NA	NA
Number of words	She can talk sentence with some unclear words	Short sentences with unclear speech	Can talk well	10 words, no sentence	6 words, no sentence	3-4word sentences	Short sentences	30-50 words, two word phrases	*	Slowly speech	Short sentence with slow speech	NA	NA	can talk	can talk	can talk 3-6 words sentences	can talk	can talk	NA	-	NA	NA	NA	10, slurred speech	10, slurred speech	10, slurred speech
Nonverbal communication	-	-	-	yes	yes				-			No	NA	NA	NA	NA	NA	NA	NA	yes	NA	no	no	no	no	no
Intellectual disability (severity, QI)	Mild (IQ 56)	moderate (IQ: 42)	Mild (IQ: 55)	Modreate( IQ: 51)	Modreate (IQ: 48)	moderate ID (IQ-46.91)	Moderate	Moderate	*	Mild ID (IQ:68)	Mild ID (IQ:60)	Mild ID (68)	Severe	Mild to Moderate	Mild to Moderate	Moderate	Moderate	Moderate	Severe	severe	severe to profound	Moderate	moderate	severe QI24	severe QI 30	severe QI 33
Able to preform basic activities of daily living (ADLs)	yes	No	Yes	some only	needs help for most activities	Yes	Yes with help	Needs help, not toilet trained	Not applicable	Yes	Yes	yes	No	Yes	Yes	Need some help	Need some help	Need some help	No	No	No	Yes	Yes	No	No	No
Regression	No	No	No	No	No	No	No	No	No	No	No	No	No	No	No	No	No	No	No	yes (at 3y)	No	No	No	No	No	No
Psychiatric features and behavior abnormalities
ADHD/Attention deficiency	Yes	Yes	No	Yes	Yes	No	No	No	*	Yes	Yes	Yes	no	No	No	No	No	No	No	Yes	Yes	No	No	No	No	No
Autism spectrum disorder	Yes	Yes	No	Yes	Yes	No	No	No	*	No	No	No	No	No	No	No	No	No	No	No	No	No	No	No	No	No
Aggressive behavior	Yes, head banging	Yes - Hitting his parents, bite his hands	Yes	Yes - Hitting his parents	Yes	Yes - Self-mutilation/Self biting	Yes - Self-mutilation/Self biting	Yes- Self-mutilation/Self biting	*	No	Yes	No	Intermittent aggression	No	No	No	No	No	Self-injurious behavior	Physical aggression to others, head banging	Aggressive behavior	No	No	No	No	No
Other behavioural and psychiatric symptoms	Psychosis with delusions and hallucinations treated with antipsychotics, masturmation like movement, saying non real stories concerning her and others	Tantrums, coprolalia, nervousness	Psychosis with delusions and hallucinations, saying non real stories concerning her and others, coprolalia treated with antipsychotics	Tantrums, nervousness	Tantrums, nervousness,excessive crying	No	No	No	No	No	No	Nail biting	No	No	No	No	No	No	Inappropriate behaviors (not specified)	No	No	No	No	Psychosis	Psychosis	Psychosis
Neuroimaging																			NA		NA	NA	NA	NA	NA	NA
Cortical anomalies	Anterior predominant pachygyria	Severe anterior-predominant undersulcation of the cortical gyral pattern consistent with pachygyria and foreshortening of the frontal lobes	Anterior predominant pachygyria	Foreshortening of the frontal lobe with mild dysgyria/simplification of the cortical gyral pattern	Foreshortening of the frontal lobe with mild dysgyria/simplification of the cortical gyral pattern	Frontal pachygyria	Diffuse pachygyria with predominant anterior gradient	NA	Pachygyria/ lissencephaly ( mostly frontally)	Diffuse pachygyria with anterior predimant gradient	Diffuse pachygyria with anterior predimant gradient	Anterior-predominant pachygyria	Undersulcation of the frontal, temporal and parietal regions resembling lissencephaly	NA	NA	NA	NA	NA	NA	Frontal pachygyria with mildly to moderately thick cortex frontally	NA	NA	NA	NA	NA	NA
Corpus callosum anomalies	Thinning	Thinning	Mildly thinning	No	No	No	No	NA	Thinning	Mildly thinning	No	Thick genu of the corpus callosum	No	NA	NA	NA	NA	NA	NA	Mild hypoplasia of the corpus callosum	NA	NA	NA	NA	NA	NA
Posterior fossa anomalies	mild vermian ypoplasia, retrocerebellar cyst	Megacisterna magna	Retrocerebellar cyst/ megacisterna magna	No	No	No	No	NA	No	No	No	No	No	NA	NA	NA	NA	NA	NA	No	NA	NA	NA	NA	NA	NA
Others	No	No	No	No	No	No	Ventriculomegaly	NA	Ventriculomegaly			No	No	NA	NA	NA	NA	NA		No
Seizure
Seizures	No	Yes	Yes	Yes	No	No	No	No	No	No	Yes	Yes	Yes	No	No	No	No	No	No	No	No	No	No	yes	yes	yes
Seizure type		Motor (tonic)	Focal (upward gaze) with secondary lose of posture tone	Motor (tonic)							Motor focal (up gaze eye deviation)	NA	Motor (generalized tonic-clonic) seizures											Generalized tonic-clonic	generalized tonic-clonic	generalized tonic-clonic
Frequency of seizures		2 times only	3 times in a week and controlled on starting treartment	2 times in all his life with a year in between							3-4 seizure per day	Only 1 seizure at 4 y	NA											NA	NA	NA
duration		5-10 minutes	3 minutes	Average 10 minutes							a few seconds	NA	NA											NA	NA	NA
Age of onset		12y	18y	19y							4y	4y	NA											NA	NA	NA
evolution		Twice and controlled	Controlled	Controlled							Seizure free	seizure free	NA											NA	NA	NA
Associated manifestations	Masturbation like movement	Headache	Headache	Cyanosis, micturation							No	No	NA											NA	NA	NA
EEG (Initial and follow up)	Mild bitemporal epileptogenic discharges; Normal EEG at FU	Frontoparietal epileptogenic discharge then normal EEG	Subcortical discharges	Temperoparietal epilepstogenic discharges, then normal	Normal						Slow wave discharges originating in the right temporal areas of the right brain hemisphere and spread to the right parietal occipital and left temporal regions	Generalized epileptiform activities with photoparoxysmal response (PPR) (at 9 y)	NA											NA	NA	NA
Anti-epileptic drugs (AEDs) (indicate drug, duration of therapy and response to therapy)	Carbamazepime (withdrew)	Valproate (withdrew)	Carbamazepine	Valproate (withdrew)							Carbamazepina	NA	NA											yes	yes	yes
Neurological examination
Deep Tendon reflexes	Brisk	Brisk	Brisk	Brisk	Brisk	Normal	Normal	Normal	2+	2+	2+	2+	2+	Normal	Normal	Normal	Normal	Normal	2+	2+	2+	2+	2+	2+	2+	2+
Muscle tone	Hypotonia	Normal	Normal	Normal	Mild hypotonia	Normal	Normal	Normal	Truncal hypotonia	Normal	Truncal hypotonia	Normal	Normal	Normal	Normal	Normal	Normal	Normal	Normal	Normal	Normal	Normal	Normal	Normal	Normal	Normal
Muscle weakness	Mild	No	No	No	No	No	No	No	No	No	yes	no	no	No	No	No	No	No	no	No	No	No	No	No	No	No
Spasticity	No	No	No	No	No	No	no	no	No	No	No	no	no	No	No	No	No	No	no	No	No	No	No	No	No	No
Ataxia	No	No	No	No	No	no	no	no	No	No	No	no	no	No	No	No	No	No	no	No	No	No	No	No	No	No
Tremor	No	Yes (mild)	No	No	No	no	no	no	No	No	No	no	no	No	No	No	No	No	no	No	No	No	No	No	No	No
Dyskinetic movements	No	No	No	No	No	no	no	no	No	No	No	no	no	No	No	No	No	No	no	No	No	No	No	No	No	No
Gait abnormalities	mild gait imbalance	No	No	No	No	Gait instablity with some falls	Normal	Gait instablity with some falls	Non-amboluatry	No	No	no	Gait- reduced arm swing	No	No	No	No	No	Gait- reduced arm swing	No	No	No	No	No	No	No
Strabismus	yes, surgically corrected	yes								Yes, bilateral	No		No	No	No	No	No	No	No	Right esotropia	No	No	No	No	No	No
Abnormal spine curvatures	No	No	No	No	No	No	No	kyphoscoliosis	No	No	No	no	no	No	No	No	No	No	no	No	No	No	No	No	No	No
Other findings	-	-	-	-	-				Feeding difficulties, poor sucking till the age of 6 months	No	No	no	Bradykinesia	No	No	No	No	No	Bradykinesia	Restricted eye movement on horizontal gaze	Convergent strabismus	No	No	No	No	No
Dysmorphic features
	Long face, bossing forehead, sparse eye brows, deep-set eyes, broad nasal root, enlarged naris, deep philtrum, full lips, broad chin	Long face, broad forehead, downslanting palpebral fissures, short philtrum, thick lower lips, broad chin	Long face, high forehead, downslanting palpebral fissure, bulbous nasal tip, short phitrum, broad chin, prominent antihelix and small ear lobes	High forehead, bitemporal narrowing, prominent supraorbital ridges, sparse laterally eyebrows, short phitrum, straight upper lip, prominent lower lip, attached ear lobs	High forehead, thick eyebrows, downslanting palpebral fissures, short phitrum	Thick eyebrows. enlarged ale naris, broad chin	High forehead, synophrys, thin upper lip	High forehead, smooth philtrum, thin upper lip, prominent ears	Wide-spaced eyes, epicanthal folds, almond shaped eyes, thin upper lip	No obvious dysmorphic features	No obvious dysmorphic features	Small ear lobes, bilateral sandal gap	No	No	No	No	No	No	No	Broad forehead	No	No, except for thick lips	No, except for thick lips	No	No	No
Miscellaneous	-	-	-	-	Recurrent infections	-	-	-	Situs inversus totalis	Unilateral renal agenesis	-	Underwent surgery at 2y for fused labia and for renal calculus at five years of age	-	-	-	-	-	-	-	-	-	-	-	Sleep disturbances	-	Sleep disturbances
Investigation
Metabolic investigations	Normal	Normal	Normal	Normal	Normal				Normal	Normal	Normal	NA	NA	No	No	No	No	No	No	No	No	No	No	No	No	No
genetic (any other findings)	Norml karyotype (46,XYX)	Norml karyotype46, XY	Norml karyotype 46,XX	Norml karyotype 46,XY	Norml karyotype 46,XX				pathogenic homozygous variant in CCDC39 gene (c.2190del p.(Glu731Asnfs*31)	Loss of heterozygosity (LOH) > 10 Mb	Loss of heterozygosity (LOH) > 10 Mb	No	No	No	No	No	No	No	No	No	No	No	No	No	No	No
EMG/NCS	Normal	Normal	Normal	Normal	Normal	NA	NA	NA	NA	Normal	Normal	NA	NA	NA	NA	NA	NA	NA	NA	NA	NA	NA	NA	NA	NA	NA
Other (if yes, please specify)	Normal fundus, ABR, Echoheart	Normal ABR, fundus	Normal fundus	Normal fundus, ABR, Echocardiography, abdominal sonar	Normal fundus, ABR, Echocardiography, immunological profile	-	-	-	TORCH screening, ABR, VFSS, showed swallowing/ breathing incordination and / poor sucking / fibro-optic larngyscopy)	-	-	-	-	-	-	-	-	-	-	-	-	-	-	-	-	-
* too young to be assessed
y=years
m=months
NA=not available

## Sheet: Feuil3
Gloria Liliana Porras Hurtado-centogene
F6-P1
c.1804_1805delGG
p.(Gly602fs)
homozygous
mild
yes
Pachygyria
Esotropia/Strabismus
Renal agenesis
